# Supplementary material
Source: publisher site journal article supplement (https://www.dovepress.com/article/270450)
Supplement: Supplementary file 1 [file get_supplementary_file.php]

**Supplementary material**

Table S1: Analysis of spreading pattern and all other factors

| Other factors | *P* value |
| --- | --- |
| Age | 0.968 |
| Sex | 0.5026 |
| History of lumbar surgery | 0.5092 |
| Level | 0.054 |
| Foraminal stenosis | 0.17 |
| Lateral recess stenosis | 0.76 |
| Disc herniation | 1 |
| Needle tip position | 0.0001358 |

Categorical variables were analyzed by Fisher’s exact test and numeric variables were analyzed by student t-test.
